# Supplementary material for: Drosophila Lipase 3 Mediates the Metabolic Response to Starvation and Aging
Source: PubMed Central journal article supplement (PMC9261307; doi:10.3389/fragi.2022.800153), 2022-02-14
Supplement: DataSheet1.pdf [file DataSheet1.pdf]

Supplement

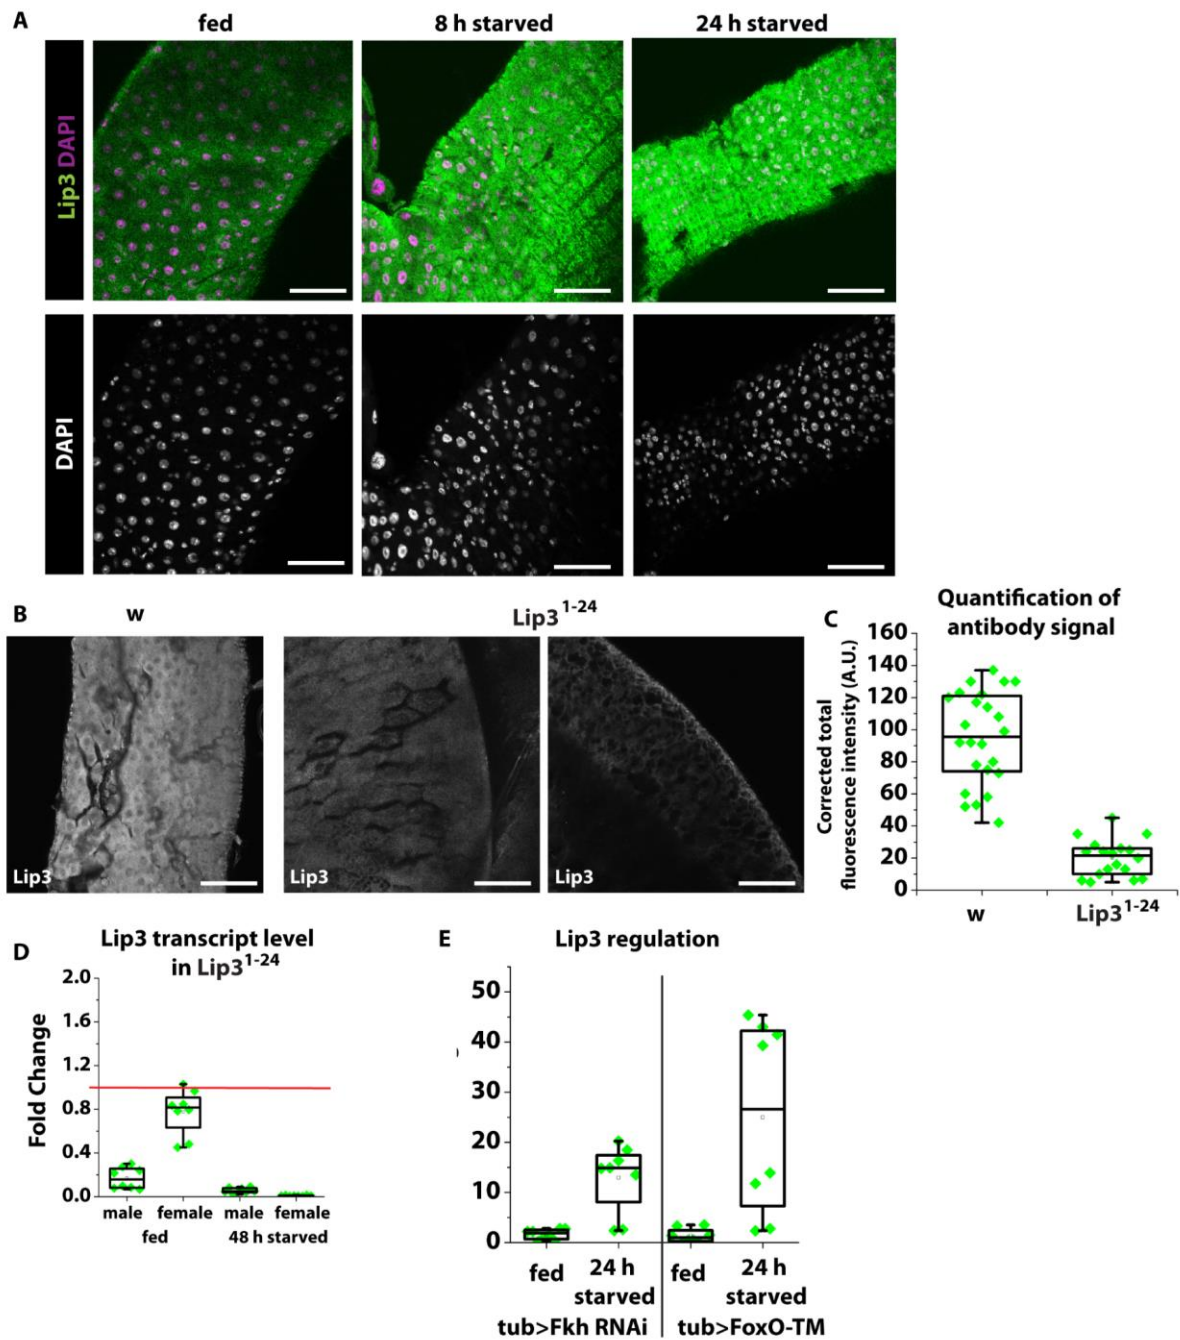

**Supplemental Figure S1:** A) Immunofluorescent staining of female midguts with anti-Lip3 in fed, 8 h starved, and 24 h starved flies. Upper panel shows merge of DAPI and Lip3 staining, lower panel shows DAPI. B) Immunofluorescent staining of female midguts with anti-Lip3 in fed wildtypes and Lip3 mutants. C) Quantification of fluorescent signal from B. D) Quantitative real-time PCR of starved male and female Lip3 mutants, normalized to their fed counterparts. E) Quantitative real-time PCR of Lip3 transcript of adult female flies, genotypes are +/+; tubulin Gal4/Fkh-RNAi and +/+; tubulin-Gal4/UAS-Foxo<sup>TM</sup>.
